SPRING 2023 | VOLUME 21 | NUMBER 2

# Focus

The Journal of Lifelong Learning in Psychiatry

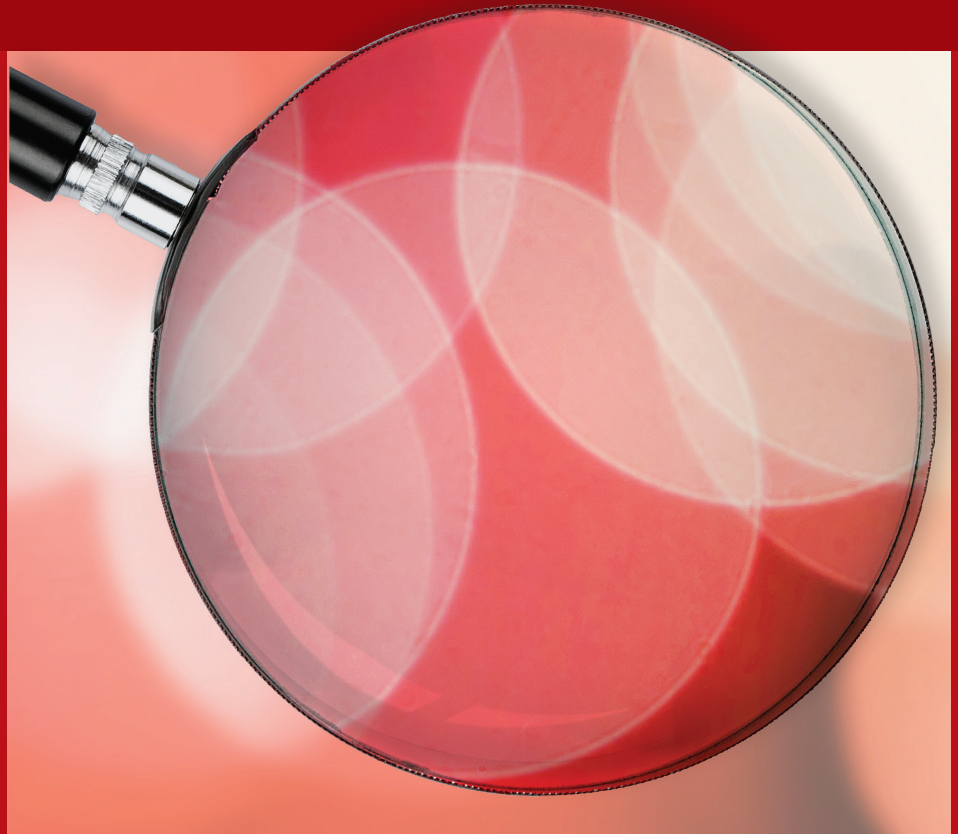

## Suicide Preventive Interventions and Knowledge

Guest Editor: Christine Yu Moutier, M.D.

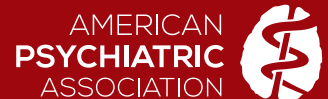

[focus.psychiatryonline.org](http://focus.psychiatryonline.org)
